# Supplementary material for: Multimode high-sensitivity optical YVO4:Ln3+ nanothermometers (Ln3+ = Eu3+, Dy3+, Sm3+) using charge transfer band features
Source: Royal Society of Chemistry journal article supplement (doi:10.1039/d0cp04048g), 2020-01-01
Supplement: d0cp04048g1.pdf [file d0cp04048g1.pdf]

**Multimode high-sensitive optical  $\text{YVO}_4:\text{Ln}^{3+}$  nanothermometers ( $\text{Ln}^{3+} = \text{Eu}^{3+}, \text{Dy}^{3+}, \text{Sm}^{3+}$ )  
using charge transfer band features**

I.E. Kolesnikov<sup>a,b,\*</sup>, M.A. Kurochkin<sup>a</sup>, E.V. Golyeva<sup>c</sup>, D.V. Mamonova<sup>a</sup>, A.A. Kalinichev<sup>a</sup>, E.Yu. Kolesnikov<sup>d</sup>, E. Lähderanta<sup>b</sup>

<sup>a</sup> *St. Petersburg State University, Universitetskaya nab. 7-9, 199034, St. Petersburg, Russia*

<sup>b</sup> *LUT University, Skinnarilankatu 34, 53850, Lappeenranta, Finland*

<sup>c</sup> *Peter the Great St. Petersburg Polytechnic University, Polytechnicheskaya str. 29, 195251, St. Petersburg, Russia*

<sup>d</sup> *Volga State University of Technology, Lenin sqr. 3, 424000, Yoshkar-Ola, Russia*

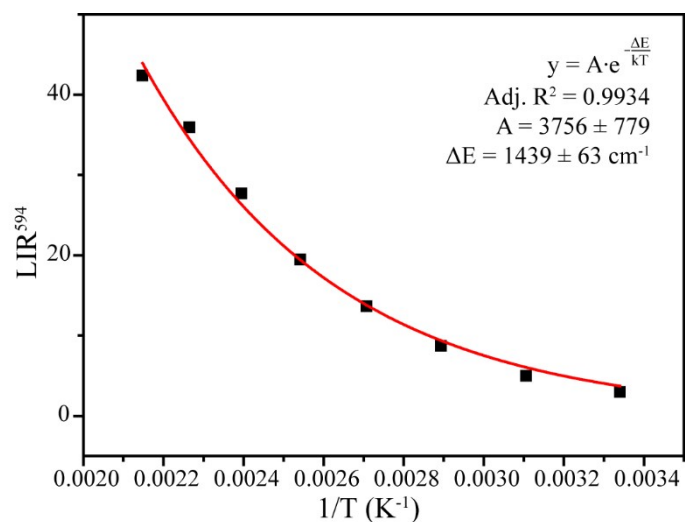

**Figure S1.** Evolution of  $\text{LIR}^{594}$  as a function of temperature for  $\text{YVO}_4:\text{Eu}^{3+}$  1 at.% nanoparticles.

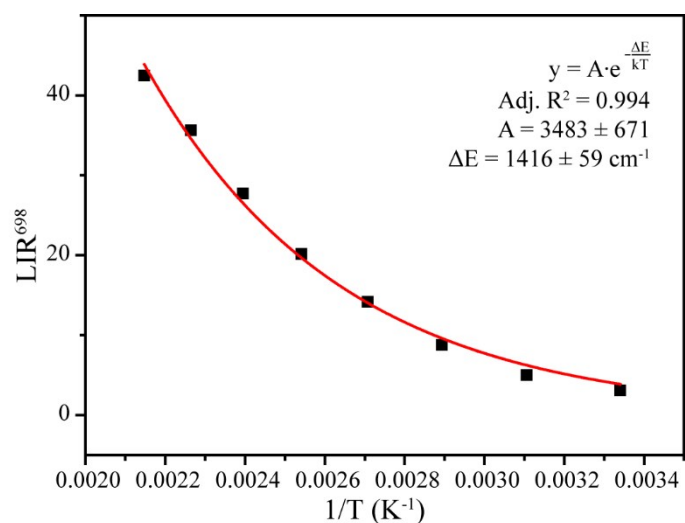

**Figure S2.** Evolution of  $\text{LIR}^{698}$  as a function of temperature for  $\text{YVO}_4:\text{Eu}^{3+}$  1 at.% nanoparticles.

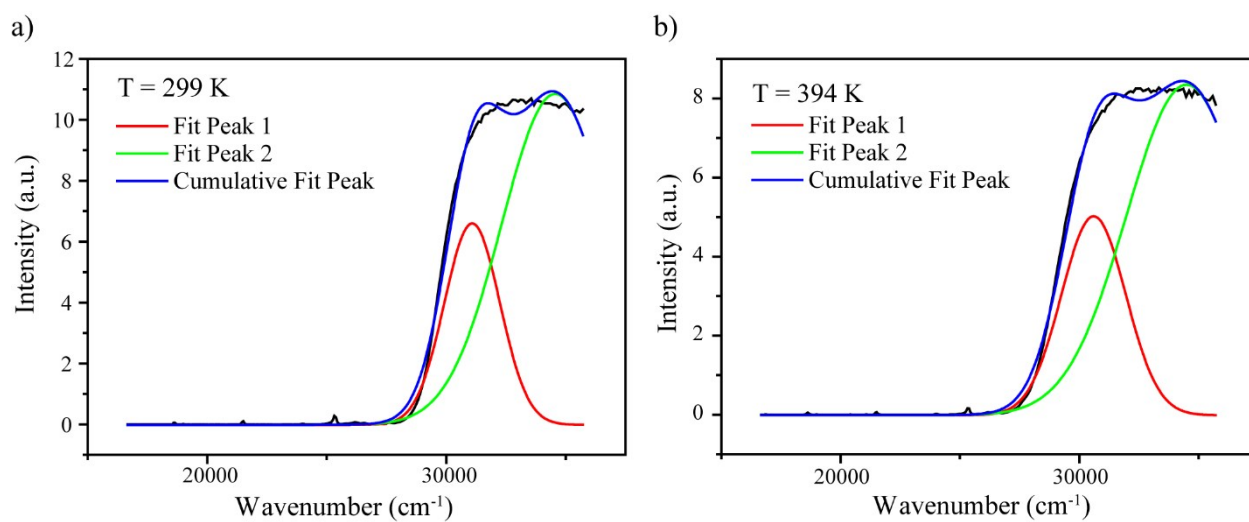

**Figure S3.** Deconvolution procedure of CTB of  $\text{YVO}_4:\text{Eu}^{3+}$  1 at.% nanoparticles a)  $T = 299$  K and b)  $T = 394$  K.

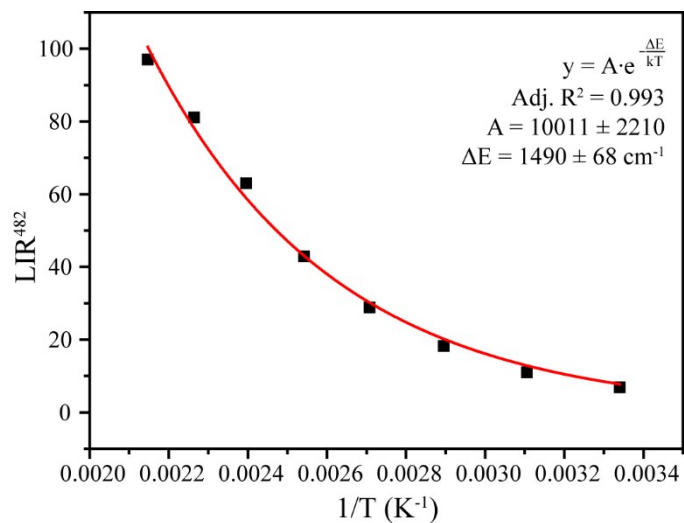

**Figure S4.** Evolution of  $\text{LIR}^{482}$  as a function of temperature for  $\text{YVO}_4:\text{Dy}^{3+}$  1 at.% nanoparticles.

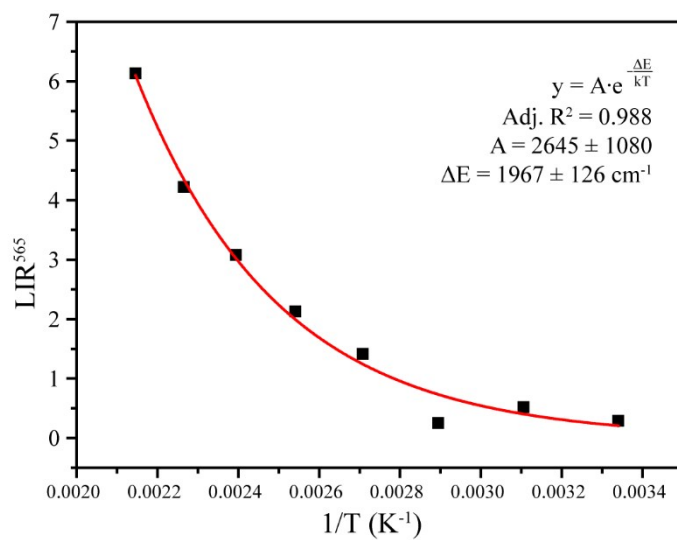

**Figure S5.** Evolution of  $\text{LIR}^{565}$  as a function of temperature for  $\text{YVO}_4:\text{Sm}^{3+}$  1 at.% nanoparticles.

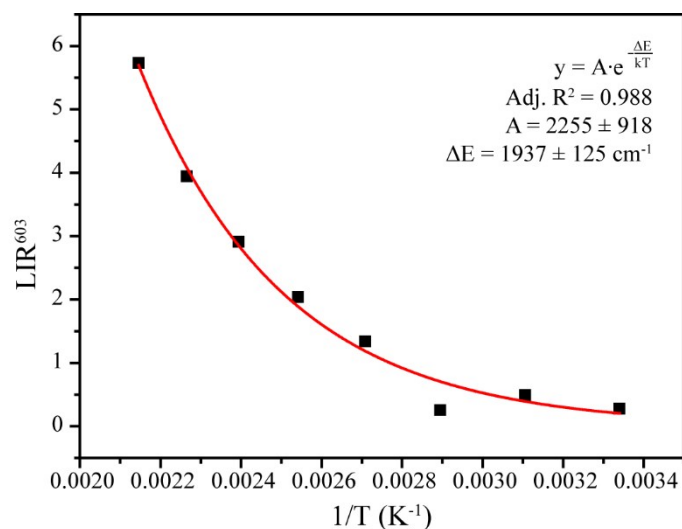

**Figure S6.** Evolution of  $LIR^{603}$  as a function of temperature for YVO<sub>4</sub>:Sm<sup>3+</sup> 1 at.% nanoparticles.

**Table S1.** Comparison of LIR-based sensitivities calculated from different transitions for YVO<sub>4</sub>:Ln<sup>3+</sup> (Ln<sup>3+</sup> = Eu<sup>3+</sup>, Dy<sup>3+</sup>, Sm<sup>3+</sup>) nanoparticles.

| Material                                   | Transition                                                              | S <sub>r</sub> (%K <sup>-1</sup> )@299K |
|--------------------------------------------|-------------------------------------------------------------------------|-----------------------------------------|
| YVO <sub>4</sub> :Eu <sup>3+</sup> 1 at. % | <sup>5</sup> D <sub>0</sub> – <sup>7</sup> F <sub>1</sub> (594 nm)      | 2.31                                    |
|                                            | <sup>5</sup> D <sub>0</sub> – <sup>7</sup> F <sub>2</sub> (619 nm)      | 2.23                                    |
|                                            | <sup>5</sup> D <sub>0</sub> – <sup>7</sup> F <sub>4</sub> (698 nm)      | 2.27                                    |
| YVO <sub>4</sub> :Dy <sup>3+</sup> 1 at. % | <sup>4</sup> F <sub>9/2</sub> – <sup>6</sup> H <sub>15/2</sub> (482 nm) | 2.39                                    |
|                                            | <sup>4</sup> F <sub>9/2</sub> – <sup>6</sup> H <sub>13/2</sub> (572 nm) | 2.37                                    |
| YVO <sub>4</sub> :Sm <sup>3+</sup> 1 at. % | <sup>4</sup> G <sub>5/2</sub> – <sup>6</sup> H <sub>5/2</sub> (565 nm)  | 3.16                                    |
|                                            | <sup>4</sup> G <sub>5/2</sub> – <sup>6</sup> H <sub>7/2</sub> (603 nm)  | 3.11                                    |
|                                            | <sup>4</sup> G <sub>5/2</sub> – <sup>6</sup> H <sub>9/2</sub> (646 nm)  | 3.09                                    |
